# Supplementary figures and images for: Platinum nanoparticles prepared by a plasma-chemical reduction method
Source: Royal Society of Chemistry journal article supplement (doi:10.1039/b508420b), 2005-01-01

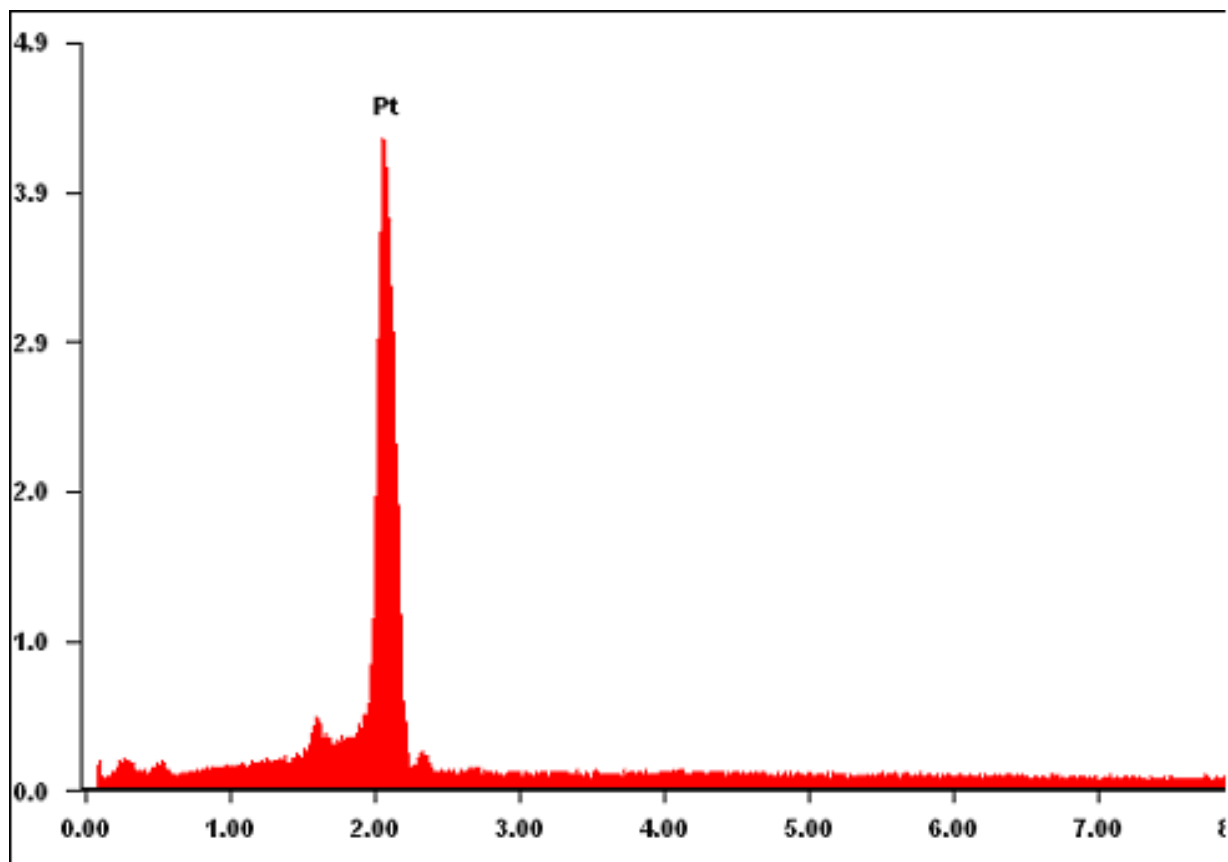

EDX spectrum of the Pt nanoparticles.

Supplement: b508420b.pdf [file b508420b.pdf]
